# Supplementary material
Source: publisher figshare collection journal article supplement (https://sage.figshare.com/ndownloader/files/22882196)
Supplement: Supplementary file 1 [file 22882196]

## Sheet: Group assignments
Study 2 - Dual infection
Determine outcome of sequential infections when second virus exposure occurs 3 days after first virus exposure	Study group	Treatment	Calf ID
Viruses used: BoCV strain OK 1776 and BVDV-2a strain RS886	A	BoCV	858
			867
	B	BoCV 3 days later BVDV	861
			863
			865
	C	BVDV2a 3 days later BoCV	862
			864
			866
	D	Non exposed	860
			868* removed from study
Study 3 - Dual infection
Determine outcome of sequential infections when BVDV exposure occurs first followed by BoCV exposures at 6 or 9 after BVDV exposure	Study group	Treatment	Calf ID
Viruses used: BoCV strain OK 1776 and BVDV-2a strain RS886	E	BVDV2A 9 days later BoCV	77
			79
			82
	F	BVDV2a 6 days later BoCV	76
			81
			86
	G	BVDV2a only	78
			80
			85
	H	No virus control	84
			87
Study 4 - Dual infection
Determine outcome of sequential infections when BVDV exposure occurs first followed by BoCV exposures at 6 or 9 after BVDV exposure	Study group	Treatment	Calf ID
Viruses used: BoCV strain OK 1776 and BVDV-2a strain RS886	M	BVDV2A 9 days later BoCV	381
			386
			387
			391
	N	BVDV2a 6 days later BoCV	376
			379
			384
			385
	O	BVDV2a only	388
			378
	P	No virus control	11
			380
	Q	BoCV only	383
			392

## Sheet: VN VI summary Study 2
Animal ID	Study group	1st day seropositivie		Days VI positive
858		BVDV-2	-	BVDV / BC	-
	A	BVDV-1	-	BVDV / NS	-
		BoCV	d9	BoCV / NS	d2,4,6
860		BVDV-2	-	BVDV / BC	-
	D	BVDV-1	-	BVDV / NS	-
		BoCV	-	BoCV / NS	-
861		BVDV-2	d17	BVDV / BC	d9,11,13
	B	BVDV-1	-	BVDV / NS	d11,13,17
		BoCV	d9	BoCV / NS	d2,4
862		BVDV-2	d13	BVDV / BC	d4,6
	C	BVDV-1	-	BVDV / NS	-
		BoCV	d13	BoCV / NS	d6,9,11,13
863		BVDV-2	d17	BVDV / BC	d9,11
	B	BVDV-1	-	BVDV / NS	d9,11,13
		BoCV	d9	BoCV / NS	d2,4,6
864		BVDV-2	d17	BVDV / BC	d4,6
	C	BVDV-1	d17	BVDV / NS	-
		BoCV	d13	BoCV / NS	d6,9
865		BVDV-2	d17	BVDV / BC	d9,11,13
	B	BVDV-1	-	BVDV / NS	d11,13
		BoCV	d6	BoCV / NS	d2,4
866		BVDV-2	d17	BVDV / BC	d4,6,9
	C	BVDV-1	-	BVDV / NS	-
		BoCV	d13	BoCV / NS	d6,9,11
867		BVDV-2	-	BVDV / BC	-
	A	BVDV-1	-	BVDV / NS	-
		BoCV	d9	BoCV / NS	d2,4,6
868		BVDV-2	-	BVDV / BC	-
	D*	BVDV-1	-	BVDV / NS	-
		BoCV	-	BoCV / NS	-

## Sheet: VN VI Data Study 2
Dual-Infection Study ACUP#2667 BVDV / BoCV
Virus Isolation & Virus Neutralization Study 2
Animal ID		DOB			d-2			d2			d4			d6			d9			d11			d13			d17
858		BVDV		BoCV	BVDV		BoCV	BVDV		BoCV	BVDV		BoCV	BVDV		BoCV	BVDV		BoCV	BVDV		BoCV	BVDV		BoCV	BVDV		BoCV
	VI/BC	NEG		NEG	NEG		NEG	NEG		NEG	NEG		NEG	NEG		NEG	NEG		NEG	NEG		NEG	NEG		NEG	NEG		NEG
	VI/NS	NEG		XX	NEG		NEG	NEG		POS	NEG		POS	NEG		POS	NEG		NEG	NEG		NEG	NEG		NEG	NEG		NEG
	VN	0/5@2	0/5@2	0/5@2	0/5@2	0/5@2	0/5@2	0/5@2	0/5@2	0/5@2	0/5@2	0/5@2	0/5@2	0/5@2	0/5@2	0/5@2	0/5@2	0/5@2	3/5@16 4/5@8	0/5@2	0/5@2	3/5@64 1/5@128	0/5@2	0/5@2	4/5@32 1/5@64 1/5@128	0/5@2	0/5@2	3/5@128
		296c	Singer	BoCV	296c	Singer	BoCV	296c	Singer	BoCV	296c	Singer	BoCV	296c	Singer	BoCV	296c	Singer	BoCV	296c	Singer	BoCV	296c	Singer	BoCV	296c	Singer	BoCV
860		BVDV		BoCV	BVDV		BoCV	BVDV		BoCV	BVDV		BoCV	BVDV		BoCV	BVDV		BoCV	BVDV		BoCV	BVDV		BoCV	BVDV		BoCV
	VI/BC	NEG		NEG	NEG		NEG	NEG		NEG	NEG		NEG	NEG		NEG	NEG		NEG	NEG		NEG	NEG		NEG	NEG		NEG
	VI/NS	NEG		XX	NEG		NEG	NEG		NEG	NEG		NEG	NEG		NEG	NEG		NEG	NEG		NEG	NEG		NEG	NEG		NEG
	VN	0/5@2	0/5@2	0/5@2	0/5@2	0/5@2	0/5@2	0/5@2	0/5@2	0/5@2	0/5@2	0/5@2	0/5@2	0/5@2	0/5@2	0/5@2	0/5@2	0/5@2	0/5@2	0/5@2	0/5@2	0/5@2	0/5@2	0/5@2	0/5@2	0/5@2	0/5@2	0/5@2
		296c	Singer	BoCV	296c	Singer	BoCV	296c	Singer	BoCV	296c	Singer	BoCV	296c	Singer	BoCV	296c	Singer	BoCV	296c	Singer	BoCV	296c	Singer	BoCV	296c	Singer	BoCV
861		BVDV		BoCV	BVDV		BoCV	BVDV		BoCV	BVDV		BoCV	BVDV		BoCV	BVDV		BoCV	BVDV		BoCV	BVDV		BoCV	BVDV		BoCV
	VI/BC	NEG		NEG	NEG		NEG	NEG		NEG	NEG		NEG	NEG		NEG	POS		NEG	POS		NEG	POS		NEG	NEG		NEG
	VI/NS	NEG		XX	NEG		NEG	NEG		POS	NEG		POS	NEG		NEG	NEG		NEG	POS		NEG	POS		NEG	POS		NEG
	VN	0/5@2	0/5@2	0/5@2	0/5@2	0/5@2	0/5@2	0/5@2	0/5@2	0/5@2	0/5@2	0/5@2	0/5@2	0/5@2	0/5@2	0/5@2	0/5@2	0/5@2	1/5@4	0/5@2	0/5@2	3/5@4 3/5@8	0/5@2	0/5@2	1/5@8	1/5@2	0/5@2	2/5@8 1/5@16
		296c	Singer	BoCV	296c	Singer	BoCV	296c	Singer	BoCV	296c	Singer	BoCV	296c	Singer	BoCV	296c	Singer	BoCV	296c	Singer	BoCV	296c	Singer	BoCV	296c	Singer	BoCV
862		BVDV		BoCV	BVDV		BoCV	BVDV		BoCV	BVDV		BoCV	BVDV		BoCV	BVDV		BoCV	BVDV		BoCV	BVDV		BoCV	BVDV		BoCV
	VI/BC	NEG		NEG	NEG		NEG	NEG		NEG	POS		NEG	POS		NEG	NEG		NEG	NEG		NEG	NEG		NEG	NEG		NEG
	VI/NS	NEG		XX	NEG		NEG	NEG		NEG	NEG		NEG	NEG		POS	NEG		POS	NEG		POS	NEG		POS	NEG		NEG
	VN	0/5@2	0/5@2	0/5@2	0/5@2	0/5@2	0/5@2	0/5@2	0/5@2	0/5@2	0/5@2	0/5@2	0/5@2	0/5@2	0/5@2	0/5@2	0/5@2	0/5@2	0/5@2	0/5@2	0/5@2	0/5@2	4/5@2 2/5@4 2/5@8	0/5@2	1/5@2	2/5@8	0/5@2	3/5@16
		296c	Singer	BoCV	296c	Singer	BoCV	296c	Singer	BoCV	296c	Singer	BoCV	296c	Singer	BoCV	296c	Singer	BoCV	296c	Singer	BoCV	296c	Singer	BoCV	296c	Singer	BoCV
863		BVDV		BoCV	BVDV		BoCV	BVDV		BoCV	BVDV		BoCV	BVDV		BoCV	BVDV		BoCV	BVDV		BoCV	BVDV		BoCV	BVDV		BoCV
	VI/BC	NEG		NEG	NEG		NEG	NEG		NEG	NEG		NEG	NEG		NEG	POS		NEG	POS		NEG	NEG		NEG	NEG		NEG
	VI/NS	NEG		XX	NEG		NEG	NEG		POS	NEG		POS	NEG		POS	POS		NEG	POS		NEG	POS		NEG	NEG		NEG
	VN	0/5@2	0/5@2	0/5@2	0/5@2	0/5@2	0/5@2	0/5@2	0/5@2	0/5@2	0/5@2	0/5@2	0/5@2	0/5@2	0/5@2	0/5@2	0/5@2	0/5@2	3/5@2	0/5@2	0/5@2	4/5@4 2/5@8	0/5@2	0/5@2	1/5@8	4/5@8	0/5@2	4/5@8 2/5@16
		296c	Singer	BoCV	296c	Singer	BoCV	296c	Singer	BoCV	296c	Singer	BoCV	296c	Singer	BoCV	296c	Singer	BoCV	296c	Singer	BoCV	296c	Singer	BoCV	296c	Singer	BoCV
864		BVDV		BoCV	BVDV		BoCV	BVDV		BoCV	BVDV		BoCV	BVDV		BoCV	BVDV		BoCV	BVDV		BoCV	BVDV		BoCV	BVDV		BoCV
	VI/BC	NEG		NEG	NEG		NEG	NEG		NEG	POS		NEG	POS		NEG	NEG		NEG	NEG		NEG	NEG		NEG	NEG		NEG
	VI/NS	NEG		XX	NEG		NEG	NEG		NEG	NEG		NEG	NEG		POS	NEG		POS	NEG		NEG	NEG		NEG	NEG		NEG
	VN	0/5@2	0/5@2	0/5@2	0/5@2	0/5@2	0/5@2	0/5@2	0/5@2	0/5@2	0/5@2	0/5@2	0/5@2	0/5@2	0/5@2	0/5@2	0/5@2	0/5@2	0/5@2	0/5@2	0/5@2	0/5@2	0/5@2	0/5@2	4/5@2	3/5@4 1/5@8	1/5@2	3/5@16 1/5@32
		296c	Singer	BoCV	296c	Singer	BoCV	296c	Singer	BoCV	296c	Singer	BoCV	296c	Singer	BoCV	296c	Singer	BoCV	296c	Singer	BoCV	296c	Singer	BoCV	296c	Singer	BoCV
865		BVDV		BoCV	BVDV		BoCV	BVDV		BoCV	BVDV		BoCV	BVDV		BoCV	BVDV		BoCV	BVDV		BoCV	BVDV		BoCV	BVDV		BoCV
	VI/BC	NEG		NEG	NEG		NEG	NEG		NEG	NEG		NEG	NEG		NEG	POS		NEG	POS		NEG	POS		NEG	NEG		NEG
	VI/NS	NEG		XX	NEG		NEG	NEG		POS	NEG		POS	NEG		NEG	NEG		NEG	POS		NEG	POS		NEG	NEG		NEG
	VN	0/5@2	0/5@2	0/5@2	0/5@2	0/5@2	0/5@2	0/5@2	0/5@2	0/5@2	0/5@2	0/5@2	0/5@2	0/5@2	0/5@2	3/5@4	0/5@2	0/5@2	4/5@8 4/5@16 2/5@32 1/5@64	0/5@2	0/5@2	3/5@64 2/5@128	0/5@2	0/5@2	4/5@32 1/5@64 2/5@128 1/5@256	1/5@2	0/5@2	3/5@32 1/5@64 2/5@128
		296c	Singer	BoCV	296c	Singer	BoCV	296c	Singer	BoCV	296c	Singer	BoCV	296c	Singer	BoCV	296c	Singer	BoCV	296c	Singer	BoCV	296c	Singer	BoCV	296c	Singer	BoCV
866		BVDV		BoCV	BVDV		BoCV	BVDV		BoCV	BVDV		BoCV	BVDV		BoCV	BVDV		BoCV	BVDV		BoCV	BVDV		BoCV	BVDV		BoCV
	VI/BC	NEG		NEG	NEG		NEG	NEG		NEG	POS		NEG	POS		NEG	POS		NRG	NEG		NEG	NEG		NEG	NEG		NEG
	VI/NS	NEG		XX	NEG		NEG	NEG		NEG	NEG		NEG	NEG		POS	NEG		POS	NEG		POS	NEG		NEG	NEG		NEG
	VN	0/5@2	0/5@2	0/5@2	0/5@2	0/5@2	0/5@2	0/5@2	0/5@2	0/5@2	0/5@2	0/5@2	0/5@2	0/5@2	0/5@2	0/5@2	0/5@2	0/5@2	0/5@2	0/5@2	0/5@2	0/5@2	0/5@2	0/5@2	4/5@4 3/5@8	3/5@4 2/5@8	0/5@2	4/5@64 1/5@128
		296c	Singer	BoCV	296c	Singer	BoCV	296c	Singer	BoCV	296c	Singer	BoCV	296c	Singer	BoCV	296c	Singer	BoCV	296c	Singer	BoCV	296c	Singer	BoCV	296c	Singer	BoCV
867		BVDV		BoCV	BVDV		BoCV	BVDV		BoCV	BVDV		BoCV	BVDV		BoCV	BVDV		BoCV	BVDV		BoCV	BVDV		BoCV	BVDV		BoCV
	VI/BC	NEG		NEG	NEG		NEG	NEG		NEG	NEG		NEG	NEG		NEG	NEG		NEG	NEG		NEG	NEG		NEG	NEG		NEG
	VI/NS	NEG		XX	NEG		NEG	NEG		POS	NEG		POS	NEG		POS	NEG		NEG	NEG		NEG	NEG		NEG	NEG		NEG
	VN	0/5@2	0/5@2	0/5@2	0/5@2	0/5@2	0/5@2	0/5@2	0/5@2	0/5@2	0/5@2	0/5@2	0/5@2	0/5@2	0/5@2	0/5@2	0/5@2	0/5@2	5/5@4	0/5@2	0/5@2	1/5@32	0/5@2	0/5@2	3/5@16	0/5@2	0/5@2	3/5@8 4/5@16
		296c	Singer	BoCV	296c	Singer	BoCV	296c	Singer	BoCV	296c	Singer	BoCV	296c	Singer	BoCV	296c	Singer	BoCV	296c	Singer	BoCV	296c	Singer	BoCV	296c	Singer	BoCV
868		BVDV		BoCV	BVDV		BoCV	BVDV		BoCV	BVDV		BoCV	BVDV		BoCV	BVDV		BoCV	BVDV		BoCV	BVDV		BoCV	BVDV		BoCV
	VI/BC	NEG		NEG	NEG		NEG	NEG		NEG	NEG		NEG	NEG		NEG	NEG		NEG	NEG		NEG	NEG		NEG	NEG		NEG
	VI/NS	NEG		XX	NEG		NEG	NEG		NEG	NEG		NEG	NEG		NEG	NEG		NEG	NEG		NEG	NEG		NEG	NEG		NEG
	VN	0/5@2	0/5@2	0/5@2	0/5@2	0/5@2	0/5@2	0/5@2	0/5@2	0/5@2	0/5@2	0/5@2	0/5@2	0/5@2	0/5@2	0/5@2	0/5@2	0/5@2	0/5@2	0/5@2	0/5@2	0/5@2	0/5@2	0/5@2	0/5@2	0/5@2	0/5@2	0/5@2
		296c	Singer	BoCV	296c	Singer	BoCV	296c	Singer	BoCV	296c	Singer	BoCV	296c	Singer	BoCV	296c	Singer	BoCV	296c	Singer	BoCV	296c	Singer	BoCV	296c	Singer	BoCV

## Sheet: Study 2 lymphocyte counts
Study 2 lymphocyte counts
Individual calf results
Group	Treatment	Calf ID	Day	Lym
A	BoCV only	858	-2	4.13
			2	4.25
			4	3.9
			6	4.52
			9	5.86
			11	5.32
			13	5.35
			17	5.74
		867	-2	2.7
			2	3.13
			4	1.84
			6	2.14
			9	2.86
			11	2.61
			13	2.8
			17	2.65
B	BoCV followed 3 days later by BVDV	861	-2	2.85
			2	2.92
			4	1.97
			6	2.84
			9	1.75
			11	1.96
			13	2.16
			17	2.43
		863	-2	4.62
			2	4.72
			4	3.23
			6	3.75
			9	2.52
			11	1.32
			13	5.07
			17	4.06
		865	-2	5.25
			2	5.04
			4	3.59
			6	4.71
			9	2.69
			11	3.38
			13	4.17
			17	3.9
C	BVDV followed 3 days later by BoCV	862	-2	4.03
			2	4.12
			4	2.34
			6	2.34
			9	3.52
			11	3.25
			13	3.85
			17	3.39
		864	-2	3.97
			2	1.56
			4	2.61
			6	1.83
			9	2.63
			11	3.84
			13	3.16
			17	3.49
		866	-2	3.11
			2	3.14
			4	1.89
			6	3.06
			9	2.56
			11	3.46
			13	3.05
			17	2.56
D	Control (non- exposed)	860	-2	3.7
			2	3.14
			4	3.14
			6	3.33
			9	3.29
			11	3.23
			13	5.22
			17	2.93
		868* removed from study	-2	3.16
			2	2.87
			4	2.83
			6	4.18
			9	4.16
			11	4.13
			13	3.91
			17	3.78

## Sheet: VN VI summary Study 3
Study 3 dual-infection VI VN summary
Animal ID	1st day seropositivie		Days VI positive		Group assignment
76	BVDV-2	d16	BVDV / BC	d6, 9
	BVDV-1	d23	BVDV / NS	d11	F
	BoCV	d16	BoCV / NS	d11, 13
77	BVDV-2	d13	BVDV / BC	d6
	BVDV-1	d20	BVDV / NS		E
	BoCV	d16	BoCV / NS	d11, 13, 16
78	BVDV-2	d20	BVDV / BC	d13
	BVDV-1	d23	BVDV / NS		G
	BoCV		BoCV / NS
79	BVDV-2	d13	BVDV / BC	d6, 9
	BVDV-1	d18	BVDV / NS	d4, 6	E
	BoCV	d18	BoCV / NS	d11, 13
80	BVDV-2	d23	BVDV / BC	d13
	BVDV-1	d23	BVDV / NS		G
	BoCV		BoCV / NS
81	BVDV-2	d16	BVDV / BC	d9
	BVDV-1	(d23)	BVDV / NS		F
	BoCV	d16	BoCV / NS	d11, 13
82	BVDV-2	d13	BVDV / BC	d4, 6, 9
	BVDV-1	d23	BVDV / NS	d6, 9	E
	BoCV	d16	BoCV / NS	d11, 13
84	BVDV-2		BVDV / BC
	BVDV-1		BVDV / NS		H
	BoCV		BoCV / NS
85	BVDV-2	d18	BVDV / BC	d11, 13
	BVDV-1	(d23)	BVDV / NS	d11	G
	BoCV		BoCV / NS
86	BVDV-2	d16	BVDV / BC	d9, 11, 13
	BVDV-1	d20	BVDV / NS	d6, 9	F
	BoCV	d16	BoCV / NS	d11, 13
87	BVDV-2		BVDV / BC
	BVDV-1		BVDV / NS		H
	BoCV		BoCV / NS

## Sheet: VN Vi data Study 3
VI VI data Study 3 dual infection
Dual-Infection Study ACUP#2667 BVDV / BoCV
Virus Isolation & Virus Neutralization Study 3
Animal ID		DOB			d-2			d2			d4			d6			d9			d11			d13			d16			d18			d20			d23
76		BVDV		BoCV	BVDV		BoCV	BVDV		BoCV	BVDV		BoCV	BVDV		BoCV	BVDV		BoCV	BVDV		BoCV	BVDV		BoCV	BVDV		BoCV	BVDV		BoCV	BVDV		BoCV	BVDV		BoCV
	VI/BC	NEG			NEG			NEG			NEG			POS			POS			NEG			NEG			NEG			NEG			NEG			NEG
	VI/NS				NEG		NEG	NEG		NEG	NEG		NEG	NEG		NEG	NEG		NEG	POS		POS	NEG		POS	NEG		NEG	NEG		NEG	NEG		NEG	NEG		NEG
	VN	0/5 @2	0/5 @2	0/5 @2	0/5 @2	0/5 @2	0/5 @2	0/5 @2	0/5 @2	0/5 @2	0/5 @2	0/5 @2	0/5 @2	0/5 @2	0/5 @2	0/5 @2	0/5 @2	0/5 @2	0/5 @2	0/5 @2	0/5 @2	0/5 @2	0/5 @2	0/5 @2	0/5 @2	4/5 @2 4/5 @4 2/5 @8	0/5 @2	2/5 @8	4/5 @8	0/5 @2	4/5 @16 3/5 @32 1/5 @64	2/5 @32	0/5 @2	4/5 @32 2/5 @64	4/5 @64 3/5 @128	2/5 @4 1/5 @8	1/5 @128
		296c	Singer	BoCV	296c	Singer	BoCV	296c	Singer	BoCV	296c	Singer	BoCV	296c	Singer	BoCV	296c	Singer	BoCV	296c	Singer	BoCV	296c	Singer	BoCV	296c	Singer	BoCV	296c	Singer	BoCV	296c	Singer	BoCV	296c	Singer	BoCV
77		BVDV		BoCV	BVDV		BoCV	BVDV		BoCV	BVDV		BoCV	BVDV		BoCV	BVDV		BoCV	BVDV		BoCV	BVDV		BoCV	BVDV		BoCV	BVDV		BoCV	BVDV		BoCV	BVDV		BoCV
	VI/BC	NEG			NEG			NEG			NEG			POS			NEG			NEG			NEG			NEG			NEG			NEG			NEG
	VI/NS				NEG		NEG	NEG		NEG	NEG		NEG	NEG		NEG	NEG		NEG	NEG		POS	NEG		POS	NEG		POS	NEG		NEG	NEG		NEG	NEG		NEG
	VN	0/5 @2	0/5 @2	0/5 @2	0/5 @2	0/5 @2	0/5 @2	0/5 @2	0/5 @2	0/5 @2	0/5 @2	0/5 @2	0/5 @2	0/5 @2	0/5 @2	0/5 @2	0/5 @2	0/5 @2	0/5 @2	0/5 @2	0/5 @2	0/5 @2	4/5 @2	0/5 @2	0/5 @2	3/5 @8	0/5 @2	2/5 @4	3/5 @8 2/5 @16	0/5 @2	4/5 @16 2/5 @32	4/5 @32 4/5 @64	2/5 @2 1/5 @4	3/5 @64 2/5 @128	2/5 @128	5/5 @4 2/5 @8	2/5 @64 3/5 @128
		296c	Singer	BoCV	296c	Singer	BoCV	296c	Singer	BoCV	296c	Singer	BoCV	296c	Singer	BoCV	296c	Singer	BoCV	296c	Singer	BoCV	296c	Singer	BoCV	296c	Singer	BoCV	296c	Singer	BoCV	296c	Singer	BoCV	296c	Singer	BoCV
78		BVDV		BoCV	BVDV		BoCV	BVDV		BoCV	BVDV		BoCV	BVDV		BoCV	BVDV		BoCV	BVDV		BoCV	BVDV		BoCV	BVDV		BoCV	BVDV		BoCV	BVDV		BoCV	BVDV		BoCV
	VI/BC	NEG			NEG			NEG			NEG			NEG			NEG			NEG			POS			NEG			NEG			NEG			NEG
	VI/NS				NEG		NEG	NEG		NEG	NEG		NEG	NEG		NEG	NEG		NEG	NEG		NEG	NEG		NEG	NEG		NEG	NEG		NEG	NEG		NEG	NEG		NEG
	VN	0/5 @2	0/5 @2	0/5 @2	0/5 @2	0/5 @2	0/5 @2	0/5 @2	0/5 @2	0/5 @2	0/5 @2	0/5 @2	0/5 @2	0/5 @2	0/5 @2	0/5 @2	0/5 @2	0/5 @2	0/5 @2	0/5 @2	0/5 @2	0/5 @2	0/5 @2	0/5 @2	0/5 @2	0/5 @2	0/5 @2	0/5 @2	0/5 @2	0/5 @2	0/5 @2	4/5 @4 1/5 @8	0/5 @2	0/5 @2	4/5 @4 3/5 @8	4/5 @2	0/5 @2
		296c	Singer	BoCV	296c	Singer	BoCV	296c	Singer	BoCV	296c	Singer	BoCV	296c	Singer	BoCV	296c	Singer	BoCV	296c	Singer	BoCV	296c	Singer	BoCV	296c	Singer	BoCV	296c	Singer	BoCV	296c	Singer	BoCV	296c	Singer	BoCV
79		BVDV		BoCV	BVDV		BoCV	BVDV		BoCV	BVDV		BoCV	BVDV		BoCV	BVDV		BoCV	BVDV		BoCV	BVDV		BoCV	BVDV		BoCV	BVDV		BoCV	BVDV		BoCV	BVDV		BoCV
	VI/BC	NEG			NEG			NEG			NEG			POS			POS			NEG			NEG			NEG			NEG			NEG			NEG
	VI/NS				NEG		NEG	NEG		NEG	POS		NEG	POS		NEG	NEG		NEG	NEG		POS	NEG		POS	NEG		NEG	NEG		NEG	NEG		NEG	NEG		NEG
	VN	0/5 @2	0/5 @2	0/5 @2	0/5 @2	0/5 @2	0/5 @2	0/5 @2	0/5 @2	0/5 @2	0/5 @2	0/5 @2	0/5 @2	0/5 @2	0/5 @2	0/5 @2	0/5 @2	0/5 @2	0/5 @2	1/5 @2	0/5 @2	0/5 @2	3/5 @2 1/5@4	0/5 @2	0/5 @2	4/5 @4 3/5 @8	0/5 @2	1/5 @2	1/5 @16	3/5 @2	4/5 @16	3/5 @32	4/5 @2 2/5 @4	3/5 @32 1/5 @64	4/5 @64 3/5 @128	5/5 @8	4/5 @16 3/5 @32
		296c	Singer	BoCV	296c	Singer	BoCV	296c	Singer	BoCV	296c	Singer	BoCV	296c	Singer	BoCV	296c	Singer	BoCV	296c	Singer	BoCV	296c	Singer	BoCV	296c	Singer	BoCV	296c	Singer	BoCV	296c	Singer	BoCV	296c	Singer	BoCV
80		BVDV		BoCV	BVDV		BoCV	BVDV		BoCV	BVDV		BoCV	BVDV		BoCV	BVDV		BoCV	BVDV		BoCV	BVDV		BoCV	BVDV		BoCV	BVDV		BoCV	BVDV		BoCV	BVDV		BoCV
	VI/BC	NEG			NEG			NEG			NEG			NEG			NEG			NEG			POS			NEG			NEG			NEG			NEG
	VI/NS				NEG		NEG	NEG		NEG	NEG		NEG	NEG		NEG	NEG		NEG	NEG		NEG	NEG		NEG	NEG		NEG	NEG		NEG	NEG		NEG	NEG		NEG
	VN	0/5 @2	0/5 @2	0/5 @2	0/5 @2	0/5 @2	0/5 @2	0/5 @2	0/5 @2	0/5 @2	0/5 @2	0/5 @2	0/5 @2	0/5 @2	0/5 @2	0/5 @2	0/5 @2	0/5 @2	0/5 @2	0/5 @2	0/5 @2	0/5 @2	0/5 @2	0/5 @2	0/5 @2	0/5 @2	0/5 @2	0/5 @2	0/5 @2	0/5 @2	0/5 @2	0/5 @2	0/5 @2	0/5 @2	4/5 @8 2/5 @16	3/5 @2	0/5 @2
		296c	Singer	BoCV	296c	Singer	BoCV	296c	Singer	BoCV	296c	Singer	BoCV	296c	Singer	BoCV	296c	Singer	BoCV	296c	Singer	BoCV	296c	Singer	BoCV	296c	Singer	BoCV	296c	Singer	BoCV	296c	Singer	BoCV	296c	Singer	BoCV
81		BVDV		BoCV	BVDV		BoCV	BVDV		BoCV	BVDV		BoCV	BVDV		BoCV	BVDV		BoCV	BVDV		BoCV	BVDV		BoCV	BVDV		BoCV	BVDV		BoCV	BVDV		BoCV	BVDV		BoCV
	VI/BC	NEG			NEG			NEG			NEG			NEG			POS			NEG			NEG			NEG			NEG			NEG			NEG
	VI/NS				NEG		NEG	NEG		NEG	NEG		NEG	NEG		NEG	NEG		NEG	NEG		POS	NEG		POS	NEG		NEG	NEG		NEG	NEG		NEG	NEG		NEG
	VN	0/5 @2	0/5 @2	0/5 @2	0/5 @2	0/5 @2	0/5 @2	0/5 @2	0/5 @2	0/5 @2	0/5 @2	0/5 @2	0/5 @2	0/5 @2	0/5 @2	0/5 @2	0/5 @2	0/5 @2	0/5 @2	0/5 @2	0/5 @2	0/5 @2	0/5 @2	0/5 @2	0/5 @2	3/5 @4	0/5 @2	3/5 @8 1/5 @16	1/5 @4	0/5 @2	2/5 @128	4/5 @4 2/5 @8	0/5 @2	5/5 @256	3/5 @16	1/5 @2	4/5 @64 3/5 @128
		296c	Singer	BoCV	296c	Singer	BoCV	296c	Singer	BoCV	296c	Singer	BoCV	296c	Singer	BoCV	296c	Singer	BoCV	296c	Singer	BoCV	296c	Singer	BoCV	296c	Singer	BoCV	296c	Singer	BoCV	296c	Singer	BoCV	296c	Singer	BoCV
82		BVDV		BoCV	BVDV		BoCV	BVDV		BoCV	BVDV		BoCV	BVDV		BoCV	BVDV		BoCV	BVDV		BoCV	BVDV		BoCV	BVDV		BoCV	BVDV		BoCV	BVDV		BoCV	BVDV		BoCV
	VI/BC	NEG			NEG			NEG			POS			POS			POS			NEG			NEG			NEG			NEG			NEG			NEG
	VI/NS				NEG		NEG	NEG		NEG	NEG		NEG	POS		NEG	POS		NEG	NEG		POS	NEG		POS	NEG		NEG	NEG		NEG	NEG		NEG	NEG		NEG
	VN	0/5 @2	0/5 @2	0/5 @2	0/5 @2	0/5 @2	0/5 @2	0/5 @2	0/5 @2	0/5 @2	0/5 @2	0/5 @2	0/5 @2	0/5 @2	0/5 @2	0/5 @2	0/5 @2	0/5 @2	0/5 @2	0/5 @2	0/5 @2	0/5 @2	3/5 @4	0/5 @2	0/5 @2	3/5 @8	0/5 @2	4/5 @8 2/5 @16	2/5 @8 3/5 @16	0/5 @2	3/5 @16 3/5 @32	4/5 @16 2/5 @32	0/5 @2	3/5 @128	3/5 @64	3/5 @2 1/5 @4	4/5 @64 3/5 @128
		296c	Singer	BoCV	296c	Singer	BoCV	296c	Singer	BoCV	296c	Singer	BoCV	296c	Singer	BoCV	296c	Singer	BoCV	296c	Singer	BoCV	296c	Singer	BoCV	296c	Singer	BoCV	296c	Singer	BoCV	296c	Singer	BoCV	296c	Singer	BoCV
84		BVDV		BoCV	BVDV		BoCV	BVDV		BoCV	BVDV		BoCV	BVDV		BoCV	BVDV		BoCV	BVDV		BoCV	BVDV		BoCV	BVDV		BoCV	BVDV		BoCV	BVDV		BoCV	BVDV		BoCV
	VI/BC	NEG			NEG			NEG			NEG			NEG			NEG			NEG			NEG			NEG			NEG			NEG			NEG
	VI/NS				NEG		NEG	NEG		NEG	NEG		NEG	NEG		NEG	NEG		NEG	NEG		NEG	NEG		NEG	NEG		NEG	NEG		NEG	NEG		NEG	NEG		NEG
	VN	0/5 @2	0/5 @2	0/5 @2	0/5 @2	0/5 @2	0/5 @2	0/5 @2	0/5 @2	0/5 @2	0/5 @2	0/5 @2	0/5 @2	0/5 @2	0/5 @2	0/5 @2	0/5 @2	0/5 @2	0/5 @2	0/5 @2	0/5 @2	0/5 @2	0/5 @2	0/5 @2	0/5 @2	0/5 @2	0/5 @2	0/5 @2	0/5 @2	0/5 @2	0/5 @2	0/5 @2	0/5 @2	0/5 @2	0/5 @2	0/5 @2	0/5 @2
		296c	Singer	BoCV	296c	Singer	BoCV	296c	Singer	BoCV	296c	Singer	BoCV	296c	Singer	BoCV	296c	Singer	BoCV	296c	Singer	BoCV	296c	Singer	BoCV	296c	Singer	BoCV	296c	Singer	BoCV	296c	Singer	BoCV	296c	Singer	BoCV
85		BVDV		BoCV	BVDV		BoCV	BVDV		BoCV	BVDV		BoCV	BVDV		BoCV	BVDV		BoCV	BVDV		BoCV	BVDV		BoCV	BVDV		BoCV	BVDV		BoCV	BVDV		BoCV	BVDV		BoCV
	VI/BC	NEG			NEG			NEG			NEG			NEG			NEG			POS			POS			NEG			NEG			NEG			NEG
	VI/NS				NEG		NEG	NEG		NEG	NEG		NEG	NEG		NEG	NEG		NEG	NEG		POS	NEG		NEG	NEG		NEG	NEG		NEG	NEG		NEG	NEG		NEG
	VN	0/5 @2	0/5 @2	0/5 @2	0/5 @2	0/5 @2	0/5 @2	0/5 @2	0/5 @2	0/5 @2	0/5 @2	0/5 @2	0/5 @2	0/5 @2	0/5 @2	0/5 @2	0/5 @2	0/5 @2	0/5 @2	0/5 @2	0/5 @2	0/5 @2	0/5 @2	0/5 @2	0/5 @2	0/5 @2	0/5 @2	0/5 @2	4/5 @2	0/5 @2	0/5 @2	4/5 @8 1/5 @16	1/5 @2	0/5 @2	3/5 @ 8 4/5 @ 16	1/5 @2	0/5 @2
		296c	Singer	BoCV	296c	Singer	BoCV	296c	Singer	BoCV	296c	Singer	BoCV	296c	Singer	BoCV	296c	Singer	BoCV	296c	Singer	BoCV	296c	Singer	BoCV	296c	Singer	BoCV	296c	Singer	BoCV	296c	Singer	BoCV	296c	Singer	BoCV
86		BVDV		BoCV	BVDV		BoCV	BVDV		BoCV	BVDV		BoCV	BVDV		BoCV	BVDV		BoCV	BVDV		BoCV	BVDV		BoCV	BVDV		BoCV	BVDV		BoCV	BVDV		BoCV	BVDV		BoCV
	VI/BC	NEG			NEG			NEG			NEG			NEG			POS			POS			POS			NEG			NEG			NEG			NEG
	VI/NS				NEG		NEG	NEG		NEG	NEG		NEG	POS		NEG	POS		NEG	NEG		POS	NEG		POS	NEG		NEG	NEG		NEG	NEG		NEG	NEG		NEG
	VN	0/5 @2	0/5 @2	0/5 @2	0/5 @2	0/5 @2	0/5 @2	0/5 @2	0/5 @2	0/5 @2	0/5 @2	0/5 @2	0/5 @2	0/5 @2	0/5 @2	0/5 @2	0/5 @2	0/5 @2	0/5 @2	0/5 @2	0/5 @2	0/5 @2	0/5 @2	0/5 @2	0/5 @2	4/5 @8 3/5 @16	0/5 @2	4/5 @4 3/5 @8	2/5 @32	0/5 @2	4/5 @8 2/5 @16	4/5 @128 2/5 @256	5/5 @2	3/5 @32 2/5 @64	3/5 @128 3/5 @256	4/5 @2 2/5 @4	4/5 @32
		296c	Singer	BoCV	296c	Singer	BoCV	296c	Singer	BoCV	296c	Singer	BoCV	296c	Singer	BoCV	296c	Singer	BoCV	296c	Singer	BoCV	296c	Singer	BoCV	296c	Singer	BoCV	296c	Singer	BoCV	296c	Singer	BoCV	296c	Singer	BoCV
87		BVDV		BoCV	BVDV		BoCV	BVDV		BoCV	BVDV		BoCV	BVDV		BoCV	BVDV		BoCV	BVDV		BoCV	BVDV		BoCV	BVDV		BoCV	BVDV		BoCV	BVDV		BoCV	BVDV		BoCV
	VI/BC	NEG			NEG			NEG			NEG			NEG			NEG			NEG			NEG			NEG			NEG			NEG			NEG
	VI/NS				NEG		NEG	NEG		NEG	NEG		NEG	NEG		NEG	NEG		NEG	NEG		NEG	NEG		NEG	NEG		NEG	NEG		NEG	NEG		NEG	NEG		NEG
	VN	0/5 @2	0/5 @2	0/5 @2	0/5 @2	0/5 @2	0/5 @2	0/5 @2	0/5 @2	0/5 @2	0/5 @2	0/5 @2	0/5 @2	0/5 @2	0/5 @2	0/5 @2	0/5 @2	0/5 @2	0/5 @2	0/5 @2	0/5 @2	0/5 @2	0/5 @2	0/5 @2	0/5 @2	0/5 @2	0/5 @2	0/5 @2	0/5 @2	0/5 @2	0/5 @2	0/5 @2	0/5 @2	0/5 @2	0/5 @2	0/5 @2	0/5 @2
		296c	Singer	BoCV	296c	Singer	BoCV	296c	Singer	BoCV	296c	Singer	BoCV	296c	Singer	BoCV	296c	Singer	BoCV	296c	Singer	BoCV	296c	Singer	BoCV	296c	Singer	BoCV	296c	Singer	BoCV	296c	Singer	BoCV	296c	Singer	BoCV

## Sheet: Study 3 lymphocyte counts
Study lymphocyte counts
Lym
Calf ID	Exp. group	Treatment	Day -2	Day 2	Day 4	Day 6	Day 9	Day 11	Day 13	Day 16	Day 18	Day 20	Day 23
77	E	BVDV-2 followed 9 days later by BoCV	3.9	2.97	2.92	2.46	3.06	2.33	2.23	2.69	2.65	2.91	3.45
79	E		6.56	4.66	4.35	3.09	3.73	2.9	3.18	5.86	4.37	4.21	5.28
82	E		5.13	2.59	3.43	2.1	2.62	2.42	2.63	3.53	3.53	3.25	3.6
76	F	BVDV-2 followed 6 days later by BoCV	2.75	3.25	3.15	2.21	1.69	2.57	1.98	2.52	2.21	2.67	2.92
81	F		3.14	3.19	3.32	2.37	2.57	2.38	2.82	3.1	2.83	3.34	3.74
86	F		3.83	3.86	3.51	2.17	1.81	2.48	2.16	2.37	2.21	2.84	3.45
78	G	BVDV-2 only	2.96	3.92	3.96	4	2.92	2.12	1.52	2.33	2.08	2.28	3.39
80	G		4.92	5.36	5.36	5.26	3.35	1.82	3.89	3.82	3.36	3.22	3.58
85	G		3.3	3.72	3.48	3.75	2.75	1.61	2.01	2.07	2.38	2.39	2.87
84	H	No virus control	3.27	3.37	3.11	3.11	3.22	2.64	3.38	3.85	3.04	3.34	3.36
87	H		2.66	1.91	2.97	3.04	2.39	2.16	2.69	2.77	2.6	2.39	3.02

## Sheet: Study 4 VN Vi summary
Study 4 VN VI summary
Animal ID	1st day seropositivie		Days VI positive		Experimentally exposed BVDV	Experimentally exposed BoCV	Group assignment
376	BVDV2	d16	BVDV / BC	d6, d9	BVDV	6 days later BoCV
	BVDV1	d18	BVDV / NS	d9			N
	BoCV	d-3	BoCV / NS
378	BVDV2	d16	BVDV / BC	d6	BVDV only	No BoCV
	BVDV1	d20	BVDV / NS	d6			O
	BoCV	d-3	BoCV / NS
379	BVDV2	d13	BVDV / BC	d9, d11	BVDV	6 days later BoCV		No animals had titers against BVDV or BoCV at DOB. At day -3, three animals (376, 378, 380) had titers against BoCV. However by day 2 none of the three animals had a measureable titer. Two of the animals (378 and 380) were not experimentally exposed to BoCV and did not have measureable antibodies against BoCV on any of the subsequent testing dates. One animal, 376, was experimentally exposed to B…
	BVDV1	d20	BVDV / NS	d9, d11			N
	BoCV		BoCV / NS
380	BVDV2		BVDV / BC		No virus control	BOCV only
	BVDV1		BVDV / NS				Q
	BoCV	d-3	BoCV / NS
381	BVDV2	d16	BVDV / BC		BVDV	9 days later BoCV
	BVDV1	d18	BVDV / NS	d9			M
	BoCV		BoCV / NS
383	BVDV2		BVDV / BC		No virus control	No virus control
	BVDV1		BVDV / NS				P
	BoCV		BoCV / NS
384	BVDV2	d16	BVDV / BC	d6, d9	BVDV	6 days later BoCV
	BVDV1	d18	BVDV / NS	d9			N
	BoCV		BoCV / NS
385	BVDV2	d16	BVDV / BC	d9, d13	BVDV	6 days later BoCV
	BVDV1	d20	BVDV / NS				N
	BoCV		BoCV / NS
386	BVDV2	d13	BVDV / BC	d6	BVDV	9 days later BoCV
	BVDV1	d18	BVDV / NS	d6, d9 (?)d16			M
	BoCV		BoCV / NS
387	BVDV2	d13	BVDV / BC	d6, d9	BVDV	9 days later BoCV
	BVDV1	d18	BVDV / NS				M
	BoCV		BoCV / NS
388	BVDV2	d13	BVDV / BC	d6, d11	BVDV only	No BoCV
	BVDV1	d16	BVDV / NS				O
	BoCV		BoCV / NS
391	BVDV2	d13	BVDV / BC	d9	BVDV	9 days later BoCV
	BVDV1	d20	BVDV / NS				M
	BoCV	d18	BoCV / NS	d11, d13, d16
392	BVDV2		BVDV / BC		No BVDV	BoCv only
	BVDV1		BVDV / NS				Q
	BoCV	d18	BoCV / NS	d13
11	BVDV2		BVDV / BC		No virus control	No virus control
	BVDV1		BVDV / NS				P
	BoCV		BoCV / NS

## Sheet: Study 4 VN VI data
Dual-Infection Study ACUP#2667 BVDV / BoCV
Virus Isolation & Virus Neutralization Study 4
Animal ID		DOB			d-3			d2			d4			d6			d9			d11			d13			d16			d18			d20			d23
376		BVDV		BoCV	BVDV		BoCV	BVDV		BoCV	BVDV		BoCV	BVDV		BoCV	BVDV		BoCV	BVDV		BoCV	BVDV		BoCV	BVDV		BoCV	BVDV		BoCV	BVDV		BoCV	BVDV		BoCV
	VI/BC	NEG			NEG			NEG			NEG			POS			POS			NEG			NEG			NEG			NEG			NEG			NEG
	VI/NS				NEG		NEG	NEG		NEG	NEG		NEG	NEG		NEG	POS		NEG	NEG		NEG	NEG		NEG	NEG		NEG	NEG		NEG	NEG		NEG	NEG		NEG
	VN	0/5 @2	0/5 @2	0/5 @2	0/5 @2	0/5 @2	2/5 @16 2/5 @32 1/6 @64	0/5 @2	0/5 @2	0/5 @2	0/5 @2	0/5 @2	0/5 @2	0/5 @2	0/5 @2	0/5 @2	0/5 @2	0/5 @2	0/5 @2	0/5 @2	0/5 @2	0/5 @2	0/5 @2	0/5 @2	0/5 @2	4/5 @2 4/5 @4 2/5 @8	0/5 @2	2/5 @8	4/5 @8	0/5 @2	4/5 @16 3/5 @32 1/5 @64	2/5 @32	0/5 @2	4/5 @32 2/5 @64	4/5 @64 3/5 @128	2/5 @4 1/5 @8	1/5 @128
		296c	Singer	BoCV	296c	Singer	BoCV	296c	Singer	BoCV	296c	Singer	BoCV	296c	Singer	BoCV	296c	Singer	BoCV	296c	Singer	BoCV	296c	Singer	BoCV	296c	Singer	BoCV	296c	Singer	BoCV	296c	Singer	BoCV	296c	Singer	BoCV
378		BVDV		BoCV	BVDV		BoCV	BVDV		BoCV	BVDV		BoCV	BVDV		BoCV	BVDV		BoCV	BVDV		BoCV	BVDV		BoCV	BVDV		BoCV	BVDV		BoCV	BVDV		BoCV	BVDV		BoCV
	VI/BC	NEG			NEG			NEG			NEG			POS			NEG			NEG			NEG			NEG			NEG			NEG			NEG
	VI/NS				NEG		NEG	NEG		NEG	NEG		NEG	NEG		NEG	NEG		NEG	NEG		POS	NEG		POS	NEG		POS	NEG		NEG	NEG		NEG	NEG		NEG
	VN	0/5 @2	0/5 @2	1/5 @2	0/5 @2	0/5 @2	4/5 @8 1/5 @16	0/5 @2	0/5 @2	0/5 @2	0/5 @2	0/5 @2	0/5 @2	0/5 @2	0/5 @2	0/5 @2	0/5 @2	0/5 @2	0/5 @2	0/5 @2	0/5 @2	0/5 @2	4/5 @2	0/5 @2	0/5 @2	3/5 @8	0/5 @2	2/5 @4	3/5 @8 2/5 @16	0/5 @2	4/5 @16 2/5 @32	4/5 @32 4/5 @64	2/5 @2 1/5 @4	3/5 @64 2/5 @128	2/5 @128	5/5 @4 2/5 @8	2/5 @64 3/5 @128
		296c	Singer	BoCV	296c	Singer	BoCV	296c	Singer	BoCV	296c	Singer	BoCV	296c	Singer	BoCV	296c	Singer	BoCV	296c	Singer	BoCV	296c	Singer	BoCV	296c	Singer	BoCV	296c	Singer	BoCV	296c	Singer	BoCV	296c	Singer	BoCV
379		BVDV		BoCV	BVDV		BoCV	BVDV		BoCV	BVDV		BoCV	BVDV		BoCV	BVDV		BoCV	BVDV		BoCV	BVDV		BoCV	BVDV		BoCV	BVDV		BoCV	BVDV		BoCV	BVDV		BoCV
	VI/BC	NEG			NEG			NEG			NEG			NEG			NEG			NEG			POS			NEG			NEG			NEG			NEG
	VI/NS				NEG		NEG	NEG		NEG	NEG		NEG	NEG		NEG	NEG		NEG	NEG		NEG	NEG		NEG	NEG		NEG	NEG		NEG	NEG		NEG	NEG		NEG
	VN	0/5 @2	0/5 @2	0/5 @2	0/5 @2	0/5 @2	2/5 @2	0/5 @2	0/5 @2	0/5 @2	0/5 @2	0/5 @2	0/5 @2	0/5 @2	0/5 @2	0/5 @2	0/5 @2	0/5 @2	0/5 @2	0/5 @2	0/5 @2	0/5 @2	0/5 @2	0/5 @2	0/5 @2	0/5 @2	0/5 @2	0/5 @2	0/5 @2	0/5 @2	0/5 @2	4/5 @4 1/5 @8	0/5 @2	0/5 @2	4/5 @4 3/5 @8	4/5 @2	0/5 @2
		296c	Singer	BoCV	296c	Singer	BoCV	296c	Singer	BoCV	296c	Singer	BoCV	296c	Singer	BoCV	296c	Singer	BoCV	296c	Singer	BoCV	296c	Singer	BoCV	296c	Singer	BoCV	296c	Singer	BoCV	296c	Singer	BoCV	296c	Singer	BoCV
380		BVDV		BoCV	BVDV		BoCV	BVDV		BoCV	BVDV		BoCV	BVDV		BoCV	BVDV		BoCV	BVDV		BoCV	BVDV		BoCV	BVDV		BoCV	BVDV		BoCV	BVDV		BoCV	BVDV		BoCV
	VI/BC	NEG			NEG			NEG			NEG			POS			POS			NEG			NEG			NEG			NEG			NEG			NEG
	VI/NS				NEG		NEG	NEG		NEG	POS		NEG	POS		NEG	NEG		NEG	NEG		POS	NEG		POS	NEG		NEG	NEG		NEG	NEG		NEG	NEG		NEG
	VN	0/5 @2	0/5 @2	3/5 @2	0/5 @2	0/5 @2	4/5 @4 3/5 @8	0/5 @2	0/5 @2	0/5 @2	0/5 @2	0/5 @2	0/5 @2	0/5 @2	0/5 @2	0/5 @2	0/5 @2	0/5 @2	0/5 @2	1/5 @2	0/5 @2	0/5 @2	3/5 @2 1/5@4	0/5 @2	0/5 @2	4/5 @4 3/5 @8	0/5 @2	1/5 @2	1/5 @16	3/5 @2	4/5 @16	3/5 @32	4/5 @2 2/5 @4	3/5 @32 1/5 @64	4/5 @64 3/5 @128	5/5 @8	4/5 @16 3/5 @32
		296c	Singer	BoCV	296c	Singer	BoCV	296c	Singer	BoCV	296c	Singer	BoCV	296c	Singer	BoCV	296c	Singer	BoCV	296c	Singer	BoCV	296c	Singer	BoCV	296c	Singer	BoCV	296c	Singer	BoCV	296c	Singer	BoCV	296c	Singer	BoCV
381		BVDV		BoCV	BVDV		BoCV	BVDV		BoCV	BVDV		BoCV	BVDV		BoCV	BVDV		BoCV	BVDV		BoCV	BVDV		BoCV	BVDV		BoCV	BVDV		BoCV	BVDV		BoCV	BVDV		BoCV
	VI/BC	NEG			NEG			NEG			NEG			NEG			NEG			NEG			POS			NEG			NEG			NEG			NEG
	VI/NS				NEG		NEG	NEG		NEG	NEG		NEG	NEG		NEG	NEG		NEG	NEG		NEG	NEG		NEG	NEG		NEG	NEG		NEG	NEG		NEG	NEG		NEG
	VN	0/5 @2	0/5 @2	0/5 @2	0/5 @2	0/5 @2	2/5 @4	0/5 @2	0/5 @2	0/5 @2	0/5 @2	0/5 @2	0/5 @2	0/5 @2	0/5 @2	0/5 @2	0/5 @2	0/5 @2	0/5 @2	0/5 @2	0/5 @2	0/5 @2	0/5 @2	0/5 @2	0/5 @2	0/5 @2	0/5 @2	0/5 @2	0/5 @2	0/5 @2	0/5 @2	0/5 @2	0/5 @2	0/5 @2	4/5 @8 2/5 @16	3/5 @2	0/5 @2
		296c	Singer	BoCV	296c	Singer	BoCV	296c	Singer	BoCV	296c	Singer	BoCV	296c	Singer	BoCV	296c	Singer	BoCV	296c	Singer	BoCV	296c	Singer	BoCV	296c	Singer	BoCV	296c	Singer	BoCV	296c	Singer	BoCV	296c	Singer	BoCV
383		BVDV		BoCV	BVDV		BoCV	BVDV		BoCV	BVDV		BoCV	BVDV		BoCV	BVDV		BoCV	BVDV		BoCV	BVDV		BoCV	BVDV		BoCV	BVDV		BoCV	BVDV		BoCV	BVDV		BoCV
	VI/BC	NEG			NEG			NEG			NEG			NEG			POS			NEG			NEG			NEG			NEG			NEG			NEG
	VI/NS				NEG		NEG	NEG		NEG	NEG		NEG	NEG		NEG	NEG		NEG	NEG		POS	NEG		POS	NEG		NEG	NEG		NEG	NEG		NEG	NEG		NEG
	VN	0/5 @2	0/5 @2	0/5 @2	0/5 @2	0/5 @2	BoCV	0/5 @2	0/5 @2	0/5 @2	0/5 @2	0/5 @2	0/5 @2	0/5 @2	0/5 @2	0/5 @2	0/5 @2	0/5 @2	0/5 @2	0/5 @2	0/5 @2	0/5 @2	0/5 @2	0/5 @2	0/5 @2	3/5 @4	0/5 @2	3/5 @8 1/5 @16	1/5 @4	0/5 @2	2/5 @128	4/5 @4 2/5 @8	0/5 @2	5/5 @256	3/5 @16	1/5 @2	4/5 @64 3/5 @128
		296c	Singer	BoCV	296c	Singer	BoCV	296c	Singer	BoCV	296c	Singer	BoCV	296c	Singer	BoCV	296c	Singer	BoCV	296c	Singer	BoCV	296c	Singer	BoCV	296c	Singer	BoCV	296c	Singer	BoCV	296c	Singer	BoCV	296c	Singer	BoCV
384		BVDV		BoCV	BVDV		BoCV	BVDV		BoCV	BVDV		BoCV	BVDV		BoCV	BVDV		BoCV	BVDV		BoCV	BVDV		BoCV	BVDV		BoCV	BVDV		BoCV	BVDV		BoCV	BVDV		BoCV
	VI/BC	NEG			NEG			NEG			POS			POS			POS			NEG			NEG			NEG			NEG			NEG			NEG
	VI/NS				NEG		NEG	NEG		NEG	NEG		NEG	POS		NEG	POS		NEG	NEG		POS	NEG		POS	NEG		NEG	NEG		NEG	NEG		NEG	NEG		NEG
	VN	0/5 @2	0/5 @2	0/5 @2	0/5 @2	0/5 @2	0/5 @2	0/5 @2	0/5 @2	0/5 @2	0/5 @2	0/5 @2	0/5 @2	0/5 @2	0/5 @2	0/5 @2	0/5 @2	0/5 @2	0/5 @2	0/5 @2	0/5 @2	0/5 @2	3/5 @4	0/5 @2	0/5 @2	3/5 @8	0/5 @2	4/5 @8 2/5 @16	2/5 @8 3/5 @16	0/5 @2	3/5 @16 3/5 @32	4/5 @16 2/5 @32	0/5 @2	3/5 @128	3/5 @64	3/5 @2 1/5 @4	4/5 @64 3/5 @128
		296c	Singer	BoCV	296c	Singer	BoCV	296c	Singer	BoCV	296c	Singer	BoCV	296c	Singer	BoCV	296c	Singer	BoCV	296c	Singer	BoCV	296c	Singer	BoCV	296c	Singer	BoCV	296c	Singer	BoCV	296c	Singer	BoCV	296c	Singer	BoCV
385		BVDV		BoCV	BVDV		BoCV	BVDV		BoCV	BVDV		BoCV	BVDV		BoCV	BVDV		BoCV	BVDV		BoCV	BVDV		BoCV	BVDV		BoCV	BVDV		BoCV	BVDV		BoCV	BVDV		BoCV
	VI/BC	NEG			NEG			NEG			NEG			NEG			NEG			NEG			NEG			NEG			NEG			NEG			NEG
	VI/NS				NEG		NEG	NEG		NEG	NEG		NEG	NEG		NEG	NEG		NEG	NEG		NEG	NEG		NEG	NEG		NEG	NEG		NEG	NEG		NEG	NEG		NEG
	VN	0/5 @2	0/5 @2	0/5 @2	0/5 @2	0/5 @2	0/5 @2	0/5 @2	0/5 @2	0/5 @2	0/5 @2	0/5 @2	0/5 @2	0/5 @2	0/5 @2	0/5 @2	0/5 @2	0/5 @2	0/5 @2	0/5 @2	0/5 @2	0/5 @2	0/5 @2	0/5 @2	0/5 @2	0/5 @2	0/5 @2	0/5 @2	0/5 @2	0/5 @2	0/5 @2	0/5 @2	0/5 @2	0/5 @2	0/5 @2	0/5 @2	0/5 @2
		296c	Singer	BoCV	296c	Singer	BoCV	296c	Singer	BoCV	296c	Singer	BoCV	296c	Singer	BoCV	296c	Singer	BoCV	296c	Singer	BoCV	296c	Singer	BoCV	296c	Singer	BoCV	296c	Singer	BoCV	296c	Singer	BoCV	296c	Singer	BoCV
386		BVDV		BoCV	BVDV		BoCV	BVDV		BoCV	BVDV		BoCV	BVDV		BoCV	BVDV		BoCV	BVDV		BoCV	BVDV		BoCV	BVDV		BoCV	BVDV		BoCV	BVDV		BoCV	BVDV		BoCV
	VI/BC	NEG			NEG			NEG			NEG			NEG			NEG			POS			POS			NEG			NEG			NEG			NEG
	VI/NS				NEG		NEG	NEG		NEG	NEG		NEG	NEG		NEG	NEG		NEG	NEG		POS	NEG		NEG	NEG		NEG	NEG		NEG	NEG		NEG	NEG		NEG
	VN	0/5 @2	0/5 @2	0/5 @2	0/5 @2	0/5 @2	0/5 @2	0/5 @2	0/5 @2	0/5 @2	0/5 @2	0/5 @2	0/5 @2	0/5 @2	0/5 @2	0/5 @2	0/5 @2	0/5 @2	0/5 @2	0/5 @2	0/5 @2	0/5 @2	0/5 @2	0/5 @2	0/5 @2	0/5 @2	0/5 @2	0/5 @2	4/5 @2	0/5 @2	0/5 @2	4/5 @8 1/5 @16	1/5 @2	0/5 @2	3/5 @ 8 4/5 @ 16	1/5 @2	0/5 @2
		296c	Singer	BoCV	296c	Singer	BoCV	296c	Singer	BoCV	296c	Singer	BoCV	296c	Singer	BoCV	296c	Singer	BoCV	296c	Singer	BoCV	296c	Singer	BoCV	296c	Singer	BoCV	296c	Singer	BoCV	296c	Singer	BoCV	296c	Singer	BoCV
387		BVDV		BoCV	BVDV		BoCV	BVDV		BoCV	BVDV		BoCV	BVDV		BoCV	BVDV		BoCV	BVDV		BoCV	BVDV		BoCV	BVDV		BoCV	BVDV		BoCV	BVDV		BoCV	BVDV		BoCV
	VI/BC	NEG			NEG			NEG			NEG			NEG			POS			POS			POS			NEG			NEG			NEG			NEG
	VI/NS				NEG		NEG	NEG		NEG	NEG		NEG	POS		NEG	POS		NEG	NEG		POS	NEG		POS	NEG		NEG	NEG		NEG	NEG		NEG	NEG		NEG
	VN	0/5 @2	0/5 @2	0/5 @2	0/5 @2	0/5 @2	0/5 @2	0/5 @2	0/5 @2	0/5 @2	0/5 @2	0/5 @2	0/5 @2	0/5 @2	0/5 @2	0/5 @2	0/5 @2	0/5 @2	0/5 @2	0/5 @2	0/5 @2	0/5 @2	0/5 @2	0/5 @2	0/5 @2	4/5 @8 3/5 @16	0/5 @2	4/5 @4 3/5 @8	2/5 @32	0/5 @2	4/5 @8 2/5 @16	4/5 @128 2/5 @256	5/5 @2	3/5 @32 2/5 @64	3/5 @128 3/5 @256	4/5 @2 2/5 @4	4/5 @32
		296c	Singer	BoCV	296c	Singer	BoCV	296c	Singer	BoCV	296c	Singer	BoCV	296c	Singer	BoCV	296c	Singer	BoCV	296c	Singer	BoCV	296c	Singer	BoCV	296c	Singer	BoCV	296c	Singer	BoCV	296c	Singer	BoCV	296c	Singer	BoCV
388		BVDV		BoCV	BVDV		BoCV	BVDV		BoCV	BVDV		BoCV	BVDV		BoCV	BVDV		BoCV	BVDV		BoCV	BVDV		BoCV	BVDV		BoCV	BVDV		BoCV	BVDV		BoCV	BVDV		BoCV
	VI/BC	NEG			NEG			NEG			NEG			NEG			NEG			NEG			NEG			NEG			NEG			NEG			NEG
	VI/NS				NEG		NEG	NEG		NEG	NEG		NEG	NEG		NEG	NEG		NEG	NEG		NEG	NEG		NEG	NEG		NEG	NEG		NEG	NEG		NEG	NEG		NEG
	VN	0/5 @2	0/5 @2	0/5 @2	0/5 @2	0/5 @2	0/5 @2	0/5 @2	0/5 @2	0/5 @2	0/5 @2	0/5 @2	0/5 @2	0/5 @2	0/5 @2	0/5 @2	0/5 @2	0/5 @2	0/5 @2	0/5 @2	0/5 @2	0/5 @2	0/5 @2	0/5 @2	0/5 @2	0/5 @2	0/5 @2	0/5 @2	0/5 @2	0/5 @2	0/5 @2	0/5 @2	0/5 @2	0/5 @2	0/5 @2	0/5 @2	0/5 @2
		296c	Singer	BoCV	296c	Singer	BoCV	296c	Singer	BoCV	296c	Singer	BoCV	296c	Singer	BoCV	296c	Singer	BoCV	296c	Singer	BoCV	296c	Singer	BoCV	296c	Singer	BoCV	296c	Singer	BoCV	296c	Singer	BoCV	296c	Singer	BoCV
391		BVDV		BoCV	BVDV		BoCV	BVDV		BoCV	BVDV		BoCV	BVDV		BoCV	BVDV		BoCV	BVDV		BoCV	BVDV		BoCV	BVDV		BoCV	BVDV		BoCV	BVDV		BoCV	BVDV		BoCV
	VI/BC	NEG			NEG			NEG			NEG			NEG			NEG			NEG			NEG			NEG			NEG			NEG			NEG
	VI/NS				NEG		NEG	NEG		NEG	NEG		NEG	NEG		NEG	NEG		NEG	NEG		NEG	NEG		NEG	NEG		NEG	NEG		NEG	NEG		NEG	NEG		NEG
	VN	0/5 @2	0/5 @2	0/5 @2	0/5 @2	0/5 @2	0/5 @2	0/5 @2	0/5 @2	0/5 @2	0/5 @2	0/5 @2	0/5 @2	0/5 @2	0/5 @2	0/5 @2	0/5 @2	0/5 @2	0/5 @2	0/5 @2	0/5 @2	0/5 @2	0/5 @2	0/5 @2	0/5 @2	0/5 @2	0/5 @2	0/5 @2	0/5 @2	0/5 @2	0/5 @2	0/5 @2	0/5 @2	0/5 @2	0/5 @2	0/5 @2	0/5 @2
		296c	Singer	BoCV	296c	Singer	BoCV	296c	Singer	BoCV	296c	Singer	BoCV	296c	Singer	BoCV	296c	Singer	BoCV	296c	Singer	BoCV	296c	Singer	BoCV	296c	Singer	BoCV	296c	Singer	BoCV	296c	Singer	BoCV	296c	Singer	BoCV
392		BVDV		BoCV	BVDV		BoCV	BVDV		BoCV	BVDV		BoCV	BVDV		BoCV	BVDV		BoCV	BVDV		BoCV	BVDV		BoCV	BVDV		BoCV	BVDV		BoCV	BVDV		BoCV	BVDV		BoCV
	VI/BC	NEG			NEG			NEG			NEG			NEG			NEG			NEG			NEG			NEG			NEG			NEG			NEG
	VI/NS				NEG		NEG	NEG		NEG	NEG		NEG	NEG		NEG	NEG		NEG	NEG		NEG	NEG		NEG	NEG		NEG	NEG		NEG	NEG		NEG	NEG		NEG
	VN	0/5 @2	0/5 @2	0/5 @2	0/5 @2	0/5 @2	0/5 @2	0/5 @2	0/5 @2	0/5 @2	0/5 @2	0/5 @2	0/5 @2	0/5 @2	0/5 @2	0/5 @2	0/5 @2	0/5 @2	0/5 @2	0/5 @2	0/5 @2	0/5 @2	0/5 @2	0/5 @2	0/5 @2	0/5 @2	0/5 @2	0/5 @2	0/5 @2	0/5 @2	0/5 @2	0/5 @2	0/5 @2	0/5 @2	0/5 @2	0/5 @2	0/5 @2
		296c	Singer	BoCV	296c	Singer	BoCV	296c	Singer	BoCV	296c	Singer	BoCV	296c	Singer	BoCV	296c	Singer	BoCV	296c	Singer	BoCV	296c	Singer	BoCV	296c	Singer	BoCV	296c	Singer	BoCV	296c	Singer	BoCV	296c	Singer	BoCV
11		BVDV		BoCV	BVDV		BoCV	BVDV		BoCV	BVDV		BoCV	BVDV		BoCV	BVDV		BoCV	BVDV		BoCV	BVDV		BoCV	BVDV		BoCV	BVDV		BoCV	BVDV		BoCV	BVDV		BoCV
	VI/BC	NEG			NEG			NEG			NEG			NEG			NEG			NEG			NEG			NEG			NEG			NEG			NEG
	VI/NS				NEG		NEG	NEG		NEG	NEG		NEG	NEG		NEG	NEG		NEG	NEG		NEG	NEG		NEG	NEG		NEG	NEG		NEG	NEG		NEG	NEG		NEG
	VN	0/5 @2	0/5 @2	0/5 @2	0/5 @2	0/5 @2	0/5 @2	0/5 @2	0/5 @2	0/5 @2	0/5 @2	0/5 @2	0/5 @2	0/5 @2	0/5 @2	0/5 @2	0/5 @2	0/5 @2	0/5 @2	0/5 @2	0/5 @2	0/5 @2	0/5 @2	0/5 @2	0/5 @2	0/5 @2	0/5 @2	0/5 @2	0/5 @2	0/5 @2	0/5 @2	0/5 @2	0/5 @2	0/5 @2	0/5 @2	0/5 @2	0/5 @2
		296c	Singer	BoCV	296c	Singer	BoCV	296c	Singer	BoCV	296c	Singer	BoCV	296c	Singer	BoCV	296c	Singer	BoCV	296c	Singer	BoCV	296c	Singer	BoCV	296c	Singer	BoCV	296c	Singer	BoCV	296c	Singer	BoCV	296c	Singer	BoCV
		Please note that VN titers are only considered positive if the titer is greater that 1/4

## Sheet: Study 4 lymphocyte counts
Study 4 lymphocyte counts
Calf ID	Exp. group	Treatment	Day -2	Day 2	Day 4	Day 6	Day 9	Day 11	Day 16	Day 18	Day 20	Day 23
381	M	BVDV-2 followed by BoCV 9 days later	5.45	4.17	4.23	3.88	4.38	3.64	4.2	3.91	4.24	4.94
386	M		3.74	2.17	2.18	1.33	1.9	1.66	2.87	2.72	3.23	3.76
387	M		2.83	3.24	2.46	2.96	2.82	4.05	3.92	4.15	4.36	2.47
391	M		2.27	1.34	1.22	1.48	1.52	2.09	1.48	3.07	2.21	0.3*
376	N	BVDV-2 followed 6 days later by BoCV	3.53	4.65	3.93	2.44	2.42	3.06	3.23	3.89	3.86	2.98
379	N		2.5	2.1	1.28	1.16	1.88	2.97	2.27	2.44	2.21	3.49
384	N		3.31	3.96	1.72	2.29	2.78	3.04	3.77	3.64	3.03	4.78
385	N		5.19	2.2	2.85	4.11	3.7	4.22	4.66	4.7	4.16	0.41*
388	O	BVDV-2 only	4.5	3.14	1.47	1.61	2.08	2.01	3.33	2.32	3.07	3.18
378	O		3.63	3.28	2.77	2.42	3.77	3.37	3.64	3.75	4.16	3.9
11	P	No virus control	1.97	2.31	2.97	3.09	2.56	2.45	3.01	3.31	3.94	3.33
380	P		3.41	3.62	3.17	3.39	3.13	3.27	3.71	3.42	3.75	4.19
383	Q	BoCV only	3.74	3.96	4.21	3.9	4.05	2.43	3.02	3.14	3.58	4.24
392	Q		1.77	3.39	2.49	2.49	5.19	3.5	3.01	2.63	3.14	3.5
